# Supplementary material for: Smart cellulose/graphene composites fabricated byin situchemical reduction of graphene oxide for multiple sensing applications
Source: Royal Society of Chemistry journal article supplement (doi:10.1039/c8ta00618k), 2018-01-01
Supplement: c8ta00618k1.pdf [file c8ta00618k1.pdf]

## Supporting Information (SI)

### **Smart cellulose/graphene composites fabricated by *in situ* chemical reduction of graphene oxide for multiple sensing applications**

Yian Chen,<sup>a,c</sup> Petra Pötschke,\*<sup>a</sup> Jürgen Pionteck,<sup>a</sup> Brigitte Voit,<sup>a,c</sup> Haisong Qi\*<sup>a,b</sup>

<sup>a</sup>*Leibniz-Institut für Polymerforschung Dresden e. V. (IPF), Hohe Straße 6, 01069  
Dresden, Germany, E-mail: poe@ipfdd.de*

<sup>b</sup>*State Key Laboratory of Pulp and Paper Engineering, South China University of  
Technology, Guangzhou, China, E-mail: qihs@scut.edu.cn*

<sup>c</sup>*Technische Universität Dresden, Organic Chemistry of Polymers, 01062 Dresden,  
Germany*

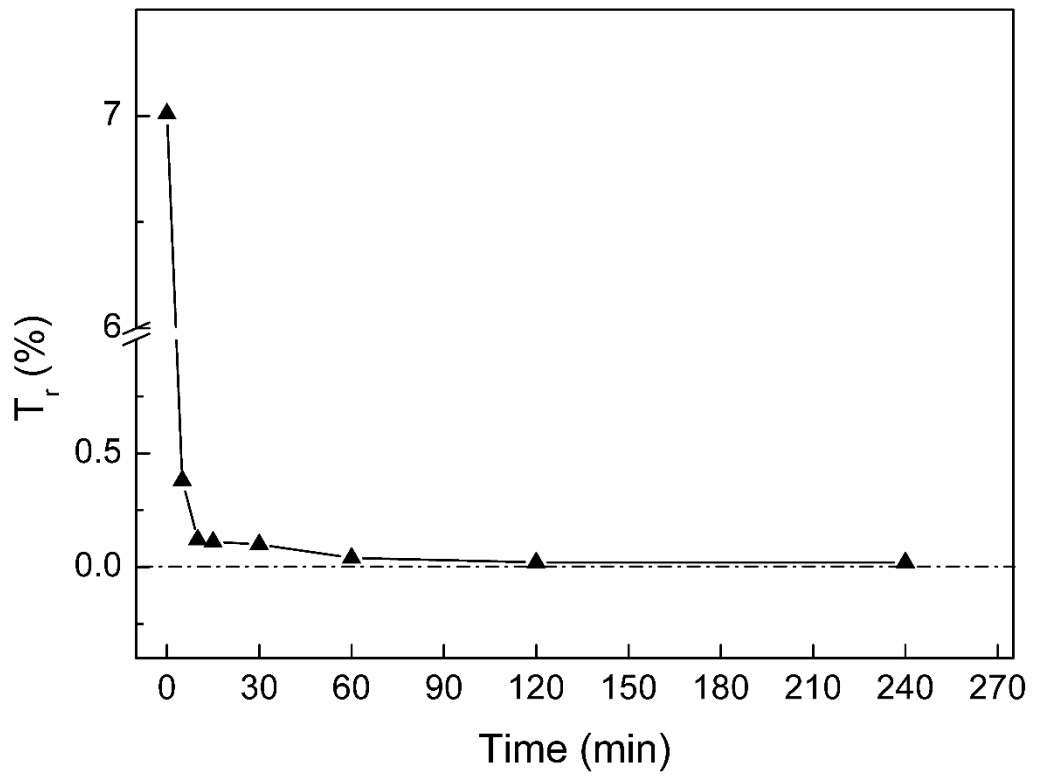

**Figure S1.** Dependence of the optical transmittance ( $T_r$ , %, 800 nm) of the rGO (5 wt%)/cellulose composite films on the time of reduction.

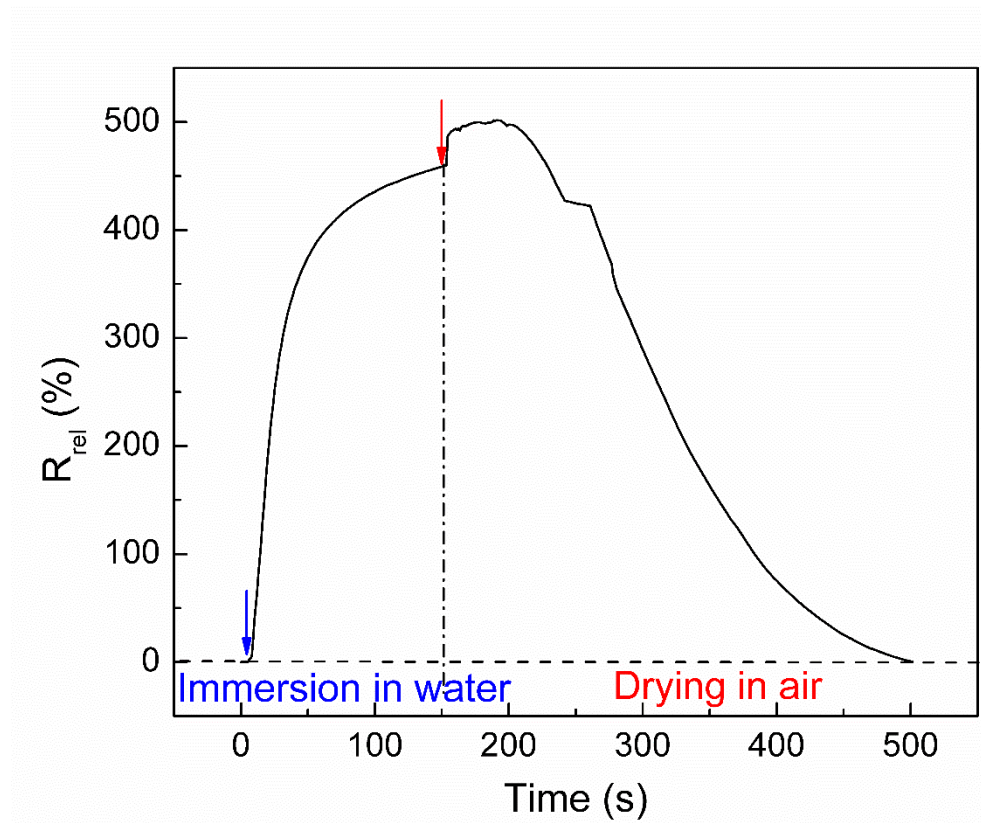

**Figure S2.** Relative resistance change ( $R_{rel}$ ) of rGO (5 wt%)/cellulose composite film during immersion/drying (150 s/350 s) cycle in water at 20 °C.

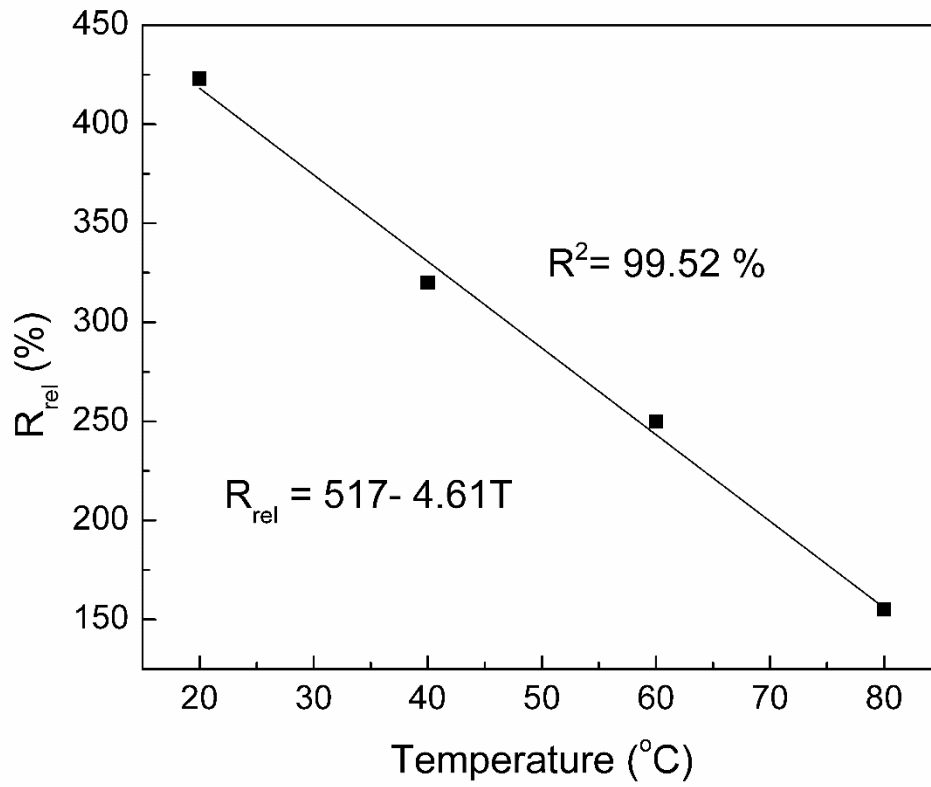

**Figure S3.**  $R_{rel}$  after 150 s immersion of the rGO (5 wt%)/cellulose composite into water depending on water temperature.

Table S1 Mechanical properties (tensile test) of films with different GO or rGO contents. The standard deviations are given in brackets.

| Sample              | $\sigma_b$ (MPa) | E (GPa)    | $\varepsilon_b$ (%) |
|---------------------|------------------|------------|---------------------|
| Cellulose           | 43.5 (3.7)       | 5.2 (0.71) | 4.4 (0.78)          |
| 2 wt% GO/cellulose  | 52.5 (5.7)       | 6.2 (0.46) | 3.8 (0.70)          |
| 3 wt% GO/cellulose  | 52.9 (7.7)       | 7.0 (0.72) | 3.1 (0.34)          |
| 5 wt% GO/cellulose  | 54.9 (3.0)       | 7.4 (0.41) | 2.4 (0.21)          |
| 8 wt% GO/cellulose  | 53.3 (4.1)       | 7.1 (0.51) | 1.7 (0.35)          |
| 2 wt% rGO/cellulose | 55.6 (5.5)       | 6.9 (0.62) | 2.8 (0.44)          |
| 3 wt% rGO/cellulose | 56.3 (6.9)       | 7.4 (0.78) | 2.7 (0.24)          |
| 5 wt% rGO/cellulose | 57.5 (4.1)       | 7.6 (0.53) | 2.6 (0.24)          |
| 8 wt% rGO/cellulose | 56.2 (3.6)       | 7.3 (0.45) | 1.6 (0.31)          |

Table S2 Results of Raman analysis of films with different GO or rGO contents.

| Sample              | D-band<br>( $\text{cm}^{-1}$ ) | G-band<br>( $\text{cm}^{-1}$ ) | D(I)/G(I)-ratio |
|---------------------|--------------------------------|--------------------------------|-----------------|
| 3 wt% GO/cellulose  | 1349                           | 1604                           | 1.07            |
| 5 wt% GO/cellulose  | 1349                           | 1603                           | 1.01            |
| 8 wt% GO/cellulose  | 1349                           | 1602                           | 1.10            |
| 3 wt% rGO/cellulose | 1351                           | 1602                           | 1.54            |
| 5 wt% rGO/cellulose | 1350                           | 1602                           | 1.46            |
| 8 wt% rGO/cellulose | 1350                           | 1601                           | 1.57            |
